# Supplementary material for: Neuromuscular Adverse Events Associated with Anti-PD-1 Monoclonal Antibodies: Systematic Review<strong> </strong>
Source: Preprints.org preprint supplement (doi:10.20944/preprints201809.0591.v1), 2018-09-29
Supplement: Supplementary file 2 [file supplementary]

Archive with 3 entries (3 files):
- flow chart.pdf
- PRISMA 2009 checklist.pdf
- Search protocol.pdf
