# Supplementary figures and images for: Neuromuscular Adverse Events Associated with Anti-PD-1 Monoclonal Antibodies: Systematic Review<strong> </strong>
Source: Preprints.org preprint supplement (doi:10.20944/preprints201809.0591.v1), 2018-09-29

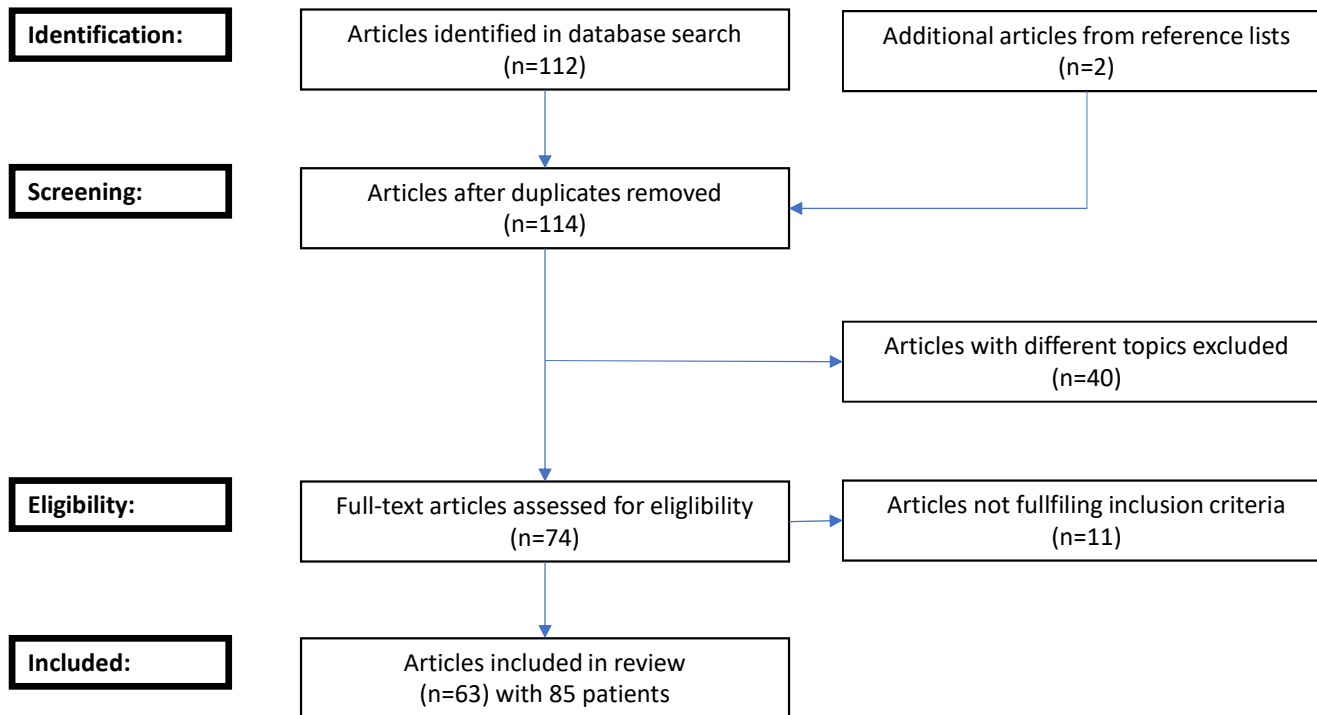

Supplement: Supplementary file 2 [file supplementary › flow chart.pdf]
